# Supplementary material for: In silico analysis of AHJD-like viruses, Staphylococcus aureus phages S24-1 and S13′, and study of phage S24-1 adsorption
Source: PubMed Central journal article supplement (PMC3996573; doi:10.1002/mbo3.166), 2014-03-04
Supplement: mbo30003-0257-sd2.pdf [file mbo30003-0257-sd2.pdf]

**Table S1. The phage lysis activities of phages S13' and S24-1 against 89 *S. aureus* strains.**

| <i>S. aureus</i><br>strain | Phages |      | <i>S. aureus</i><br>strain | Phages |      | <i>S. aureus</i><br>strain | Phages |      |
|----------------------------|--------|------|----------------------------|--------|------|----------------------------|--------|------|
|                            | S24-1  | S13' |                            | S24-1  | S13' |                            | S24-1  | S13' |
| SA1                        | ○      | ○    | SA37                       | ○      | ○    | MR22                       | ○      | ○    |
| SA2                        | ○      | ○    | SA38                       | ○      | ○    | MR23                       | ○      | ○    |
| SA3                        | ○      | ○    | SA39                       | ○      | ○    | MR24                       | ○      | ○    |
| SA4                        | ○      | ○    | SA40                       | ○      | ○    | MR25                       | ○      | ○    |
| SA5                        | ○      | ○    | SA41                       | ○      | ○    | MR26                       | ○      | ○    |
| SA6                        | ○      | ○    | SA42                       | ○      | ○    | MR27                       | ○      | ○    |
| SA7                        | ○      | ○    | SA43                       | ○      | ○    | MR28                       | ○      | ○    |
| SA8                        | ○      | ○    | SA44                       | ○      | ○    | MR29                       | ○      | ○    |
| SA9                        | ○      | ○    | SA45                       | ○      | ○    | MR30                       | ○      | ○    |
| SA10                       | ○      | ○    | SA46                       | ○      | ○    |                            |        |      |
| SA12                       | ○      | ○    | SA47                       | ○      | ○    | TY12                       | ○      | ○    |
| SA14                       | ○      | ○    | SA48                       | ○      | ○    | TY21                       | ○      | ×    |
| SA15                       | ○      | ○    | MR1                        | ○      | ○    | TY115                      | ○      | ○    |
| SA16                       | ○      | ○    | MR3                        | ○      | ○    | TY116                      | ○      | ×    |
| SA17                       | ○      | ○    | MR4                        | ○      | ○    | TY117                      | ○      | ○    |
| SA18                       | ○      | ○    | MR5                        | ○      | ○    | TY127                      | ○      | ○    |
| SA19                       | ○      | ×    | MR6                        | ○      | ○    | TY147                      | ○      | ○    |
| SA21                       | ○      | ○    | MR7                        | ○      | ○    | TY148                      | ○      | ○    |
| SA22                       | ○      | ○    | MR8                        | ○      | ×    | TY154                      | ○      | ○    |
| SA23                       | ○      | ○    | MR9                        | ○      | ○    | TY162                      | ○      | ○    |
| SA24                       | ○      | ○    | MR11                       | ○      | ○    |                            |        |      |
| SA25                       | ○      | ○    | MR12                       | ○      | ○    | COL                        | ○      | ○    |
| SA26                       | ○      | ×    | MR13                       | ○      | ○    | RN4220                     | ○      | ○    |
| SA27                       | ○      | ○    | MR14                       | ○      | ○    | 209P                       | ○      | ○    |
| SA28                       | ○      | ○    | MR15                       | ○      | ○    | NCTC10442                  | ○      | ○    |
| SA30                       | ○      | ○    | MR16                       | ○      | ○    | 85/2082                    | ○      | ○    |
| SA31                       | ○      | ×    | MR17                       | ○      | ○    | N315                       | ○      | ○    |
| SA32                       | ○      | ○    | MR18                       | ○      | ○    | 85/4547                    | ○      | ○    |
| SA33                       | ○      | ○    | MR19                       | ○      | ○    | MR108                      | ○      | ○    |
| SA34                       | ○      | ○    | MR20                       | ○      | ○    |                            |        |      |
| SA36                       | ○      | ○    | MR21                       | ○      | ○    |                            |        |      |

×, not lysed; ○, lysis.

The phage lytic activity was examined using a spot test.

The *S. aureus* strains that were sensitive to phage S24-1, but insensitive to phage S13' are highlighted in gray.
