# Supplementary material for: In silico analysis of AHJD-like viruses, Staphylococcus aureus phages S24-1 and S13′, and study of phage S24-1 adsorption
Source: PubMed Central journal article supplement (PMC3996573; doi:10.1002/mbo3.166), 2014-03-04
Supplement: mbo30003-0257-sd3.pdf [file mbo30003-0257-sd3.pdf]

**Table S2. Bacterial strains used in this study and their phage S24-1 infectivity.**

| Bacteria              |                                          |                                          | Phage S24-1 infectivity <sup>a</sup> |   |
|-----------------------|------------------------------------------|------------------------------------------|--------------------------------------|---|
| Genus                 | Species                                  | Strain                                   |                                      |   |
| <i>Bacillus</i>       | <i>cereus</i>                            | IID 1681 (ATCC 14579)                    | ×                                    |   |
|                       | <i>subtilis</i>                          | NCTC 3610                                | ×                                    |   |
| <i>Escherichia</i>    | <i>coli</i>                              | DH5a                                     | ×                                    |   |
|                       |                                          | BL21                                     | ×                                    |   |
| <i>Enterococcus</i>   | <i>faecalis</i>                          | EF24                                     | ×                                    |   |
|                       |                                          | ND547 (ATCC49761)                        | ×                                    |   |
|                       |                                          | ATCC19433-U                              | ×                                    |   |
|                       | <i>faecium</i>                           | EFum2                                    | ×                                    |   |
|                       |                                          | EFum3                                    | ×                                    |   |
| <i>Pseudomonas</i>    | <i>aeruginosa</i>                        | PAO1                                     | ×                                    |   |
| <i>Staphylococcus</i> | <i>aureus</i><br>(methicillin-sensitive) | SA7                                      | ○                                    |   |
|                       |                                          | SA14                                     | ○                                    |   |
|                       |                                          | SA17                                     | ○                                    |   |
|                       |                                          | SA21                                     | ○                                    |   |
|                       |                                          | SA27                                     | ○                                    |   |
|                       |                                          | SA28                                     | ○                                    |   |
|                       |                                          | SA32                                     | ○                                    |   |
|                       |                                          | SA34                                     | ○                                    |   |
|                       |                                          | SA39                                     | ○                                    |   |
|                       |                                          | SA42                                     | ○                                    |   |
|                       |                                          | <i>aureus</i><br>(methicillin-resistant) | MRSA13                               | ○ |
|                       |                                          | MRSA15                                   | ○                                    |   |
|                       |                                          | MRSA24                                   | ○                                    |   |
|                       | NCTC10442                                | ○                                        |                                      |   |
|                       | 85/2082                                  | ○                                        |                                      |   |
|                       | MR108                                    | ○                                        |                                      |   |
|                       | <i>auricularis</i>                       | GIFU10395                                | ×                                    |   |
|                       | <i>epidermidis</i>                       | SE17                                     | ×                                    |   |
|                       |                                          | ATCC12228                                | ×                                    |   |
|                       | <i>saprolyticus</i>                      | ATCC15305                                | ×                                    |   |

<sup>a</sup>, "○" and "×" indicate "plaque-forming" and "non-plaque-forming," respectively.
