# Supplementary material for: In silico analysis of AHJD-like viruses, Staphylococcus aureus phages S24-1 and S13′, and study of phage S24-1 adsorption
Source: PubMed Central journal article supplement (PMC3996573; doi:10.1002/mbo3.166), 2014-03-04
Supplement: mbo30003-0257-sd4.pdf [file mbo30003-0257-sd4.pdf]

**Table S3. List of primers used in this study.**

| <b>Primer</b> | <b>Sequence</b>                                              |
|---------------|--------------------------------------------------------------|
| S24-1_ORF16F  | CCCGGTACCATGGCATATAATGAAAACGATTTTAAATATTTTGACG               |
| ORF16dF0      | CGTAAAACGGTGTGTAACGTTCTC                                     |
| ORF16dF1      | AAAAGGTACCATAGATAAAAATTATTCATGATGAATTTACTAAA                 |
| ORF16dF2      | AAAAGGTACCAAATTAACGCCTAGTGGTGATTTA                           |
| ORF16dF3      | AAAAGGTACCGAAGATGTAATTAATCACATTGACAAT                        |
| ORF16dF4      | AAAAGGTACCTCTTTATTAATTGCATATACAACCTGCT                       |
| ORF16dF5      | AAAAGGTACCTTAGGTGGATATCAAGAATTAACAAG                         |
| S24-1_ORF16R  | CCCAAGCTTTTTTTTGATGTTTTGCTACCCAATCATACTC                     |
| ORF16dR0      | CGTGAGTATGATTGGGTAGCAAAAC                                    |
| ORF16dR1'     | TTTTAAGCTTCCACTTACCAAATTCAAATTTTTGTG                         |
| ORF16dR2'     | TTTTAAGCTTACCTTTTAACGTTAATGCAACAAAAC                         |
| ORF16dR3'     | TTTTAAGCTTAACTGCAATACCTTGCATAGG                              |
| ORF16dR4'     | TTTTAAGCTTCAACCATATTTTTATCTCACCGTT                           |
| ORF16dR5'     | TTTTAAGCTTTTCTGCTTTAAAGTCATTGTTTT                            |
| K_ORF68_F     | TTTGGTACCATGGCATTAAATTTTACTACAATAACGGAAAAC                   |
| K_ORF68_R     | TTTAAGCTTCTATGGCATATTAATACCTATAATTCTTGTAAC                   |
| K_ORF68_HIS_R | TTTAAGCTTATGATGATGATGATGATGTGGCATATTAATACCTATAATTCTTGTAACGTA |
