# Supplementary material for: In silico analysis of AHJD-like viruses, Staphylococcus aureus phages S24-1 and S13′, and study of phage S24-1 adsorption
Source: PubMed Central journal article supplement (PMC3996573; doi:10.1002/mbo3.166), 2014-03-04
Supplement: mbo30003-0257-sd5.pdf [file mbo30003-0257-sd5.pdf]

**Table S4. PCR products and primer lists.**

| Primers                      | PCR method                          | Description of PCR product             | Recombinant proteins | Location of 6 × His tag <sup>a</sup> (expression vector) | Description of recombinant protein     |
|------------------------------|-------------------------------------|----------------------------------------|----------------------|----------------------------------------------------------|----------------------------------------|
| S24-1_ORF16F<br>S24-1_ORF16R | PCR with genomic DNA                | <i>orf16</i> cloned into pUC18 (pUC18) | rORF16               | N (pCold II)                                             | Recombinant ORF16                      |
| ORF16dF0<br>ORF16dF1         | inverse PCR with pUC18 <i>orf16</i> | 5'-truncated <i>orf16</i>              | ORF16F1              | N (pCold II)                                             | N-terminally deleted recombinant ORF16 |
| ORF16dF0<br>ORF16dF2         | inverse PCR with pUC18 <i>orf16</i> | 5'-truncated <i>orf16</i>              | ORF16F2              | N (pCold II)                                             | N-terminally deleted recombinant ORF16 |
| ORF16dF0<br>ORF16dF3         | inverse PCR with pUC18 <i>orf16</i> | 5'-truncated <i>orf16</i>              | ORF16F3              | N (pCold II)                                             | N-terminally deleted recombinant ORF16 |
| ORF16dF0<br>ORF16dF4         | inverse PCR with pUC18 <i>orf16</i> | 5'-truncated <i>orf16</i>              | ORF16F4              | N (pCold II)                                             | N-terminally deleted recombinant ORF16 |
| ORF16dF0<br>ORF16dF5         | inverse PCR with pUC18 <i>orf16</i> | 5'-truncated <i>orf16</i>              | ORF16F5              | N (pCold II)                                             | N-terminally deleted recombinant ORF16 |
| ORF16dR0<br>ORR16dR1         | inverse PCR with pUC18 <i>orf16</i> | 3'-truncated <i>orf16</i>              | ORF16R1              | N (pCold II)                                             | C-terminally deleted recombinant ORF16 |
| ORR16dR0<br>ORR16dR2         | inverse PCR with pUC18 <i>orf16</i> | 3'-truncated <i>orf16</i>              | ORF16R2              | N (pCold II)                                             | C-terminally deleted recombinant ORF16 |
| ORR16dR0<br>ORR16dR3         | inverse PCR with pUC18 <i>orf16</i> | 3'-truncated <i>orf16</i>              | ORF16R3              | N (pCold II)                                             | C-terminally deleted recombinant ORF16 |
| ORR16dR0<br>ORR16dR4         | inverse PCR with pUC18 <i>orf16</i> | 3'-truncated <i>orf16</i>              | ORF16R4              | N (pCold II)                                             | C-terminally deleted recombinant ORF16 |
| ORR16dR0<br>ORR16dR5         | inverse PCR with pUC18 <i>orf16</i> | 3'-truncated <i>orf16</i>              | ORF16R5              | N (pCold II)                                             | C-terminally deleted recombinant ORF16 |
| K_ORF68_F<br>K_ORF68_R       | PCR with genomic DNA                | <i>orf68</i> of phage K                | KORF68n-his          | N (pCold II)                                             | Recombinant ORF68 of phage K           |
| K_ORF68_F<br>K_ORF68_HIS_R   | PCR with genomic DNA                | <i>orf68</i> of phage K                | KORF68c-his          | C (pCold III)                                            | Recombinant ORF68 of phage K           |

<sup>a</sup>, "N" and "C" indicate "N-terminal" and "C-terminal," respectively.
