# Supplementary material for: In silico analysis of AHJD-like viruses, Staphylococcus aureus phages S24-1 and S13′, and study of phage S24-1 adsorption
Source: PubMed Central journal article supplement (PMC3996573; doi:10.1002/mbo3.166), 2014-03-04
Supplement: mbo30003-0257-sd6.pdf [file mbo30003-0257-sd6.pdf]

**Table S5. Annotation of the phage S13' genome.**

| ORF | Location |       | Orientation | Length |      | RBS <sup>a</sup>     | MW (kDa) | Predicted ORF function              |
|-----|----------|-------|-------------|--------|------|----------------------|----------|-------------------------------------|
|     | Start    | End   |             | (nt)   | (AA) |                      |          |                                     |
| 1   | 437      | 559   | +           | 123    | 40   | ATGGTGATATAGCTATTCTT | 4.6      |                                     |
| 2   | 552      | 854   | +           | 303    | 100  | TATGGAGTGATAACA      | 11.6     |                                     |
| 3   | 872      | 1108  | +           | 237    | 78   | TAGAAAGGAGTGATATAATA | 9.3      |                                     |
| 4   | 1132     | 1500  | +           | 369    | 122  | AGAGGAGAAATAAAA      | 14.4     | Single stranded DNA binding protein |
| 5   | 1550     | 1726  | +           | 177    | 58   | TTATGAGGTGCTTAA      | 7.2      |                                     |
| 6   | 1728     | 2132  | +           | 405    | 134  | TTAAGGAGATATAAA      | 16.2     |                                     |
| 7   | 2125     | 2295  | +           | 171    | 56   | TTTAGGAAAAGTGATTGACC | 6.5      |                                     |
| 8   | 2298     | 2780  | +           | 483    | 160  | TTATATGGAGGTCGTTAGCA | 19.6     |                                     |
| 9   | 2828     | 4075  | +           | 1248   | 415  | ACAAGGAGAAAAAAC      | 50.4     |                                     |
| 10  | 4090     | 6375  | +           | 2286   | 761  | ATATAAAGGTGTGTAAGATT | 90.3     | DNA polymerase                      |
| 11  | 6490     | 7929  | -           | 1440   | 479  | TTCTGAAAAGAGTGATAATA | 52.3     | Tail lysin                          |
| 12  | 7904     | 8326  | -           | 423    | 140  | TTTAGACCAGGTGTATAAAA | 16.2     | Holin                               |
| 13  | 8329     | 10092 | -           | 1764   | 587  | TTTATGGAGGTAAAA      | 68.4     | Major tail protein                  |
| 14  | 10149    | 11594 | -           | 1446   | 481  | TAAGAGGTGTGAACA      | 54.8     | Minor tail protein                  |
| 15  | 11657    | 12418 | -           | 762    | 253  | AAAGGATAATGTTTC      | 29.0     | Endolysin                           |
| 16  | 12425    | 14362 | -           | 1938   | 645  | TTTGGTAAAGGTGGAAAATT | 74.5     | Minor structural protein            |
| 17  | 14375    | 15130 | -           | 756    | 251  | TGATGAAAGTAGTGAATACA | 29.2     | Lower collar protein                |
| 18  | 15123    | 16106 | -           | 984    | 327  | ATAGAGGTGCTATAA      | 37.9     | Upper collar protein                |
| 19  | 16121    | 17332 | -           | 1212   | 403  | TAGAGGAGGAATAATAAATC | 46.1     | Major capsid protein                |
| 20  | 17339    | 17521 | -           | 183    | 60   | AGGAGGAATTTAAAC      | 6.9      |                                     |
| 21  | 17535    | 17897 | -           | 363    | 120  | TTTGGAGGTGTCAAA      | 13.8     |                                     |

<sup>a</sup>, Putative ribosome-binding site in red.
